# Supplementary material
Source: publisher site journal article supplement (https://www.dovepress.com/article/264437)

**Unique mortality profile in Japanese patients with chronic obstructive pulmonary disease: An analysis from the Hokkaido COPD cohort study**

Hironi Makita, Masaru Suzuki, Satoshi Konno, Kaoruko Shimizu, Yasuyuki Nasuhara,  
Katsura Nagai, Yasushi Akiyama, Satoshi Fuke, Hiroshi Saito, Takeshi Igarashi,  
Kimihiro Takeyabu, Masaharu Nishimura

Online supplement

## **Hokkaido COPD cohort study investigators**

### **KKR Sapporo Medical Center**

Youichi Nishiura, Tetsuya Kojima, Kazuhiko Sakai, Yoriko Demura, Yukihiro Tsuchida,  
Motoko Tsubono, Kazuhiro Tsuboya, Shinichi Kakimoto

### **Hokkaido Chuo Rosai Hospital**

Kiyonobu Kimura, Kenji Miyamoto, Ikuo Nakano, Motoo Katabami, Kouichi Itabashi,  
Kiyoshi Morikawa, Seiichi Tagami, Yoshihiro Otsuka, Rika Sato, Junichiro Kojima,  
Shinji Nigawara, Takashi Morioka, Ichiro Sakai, Shiro Fujii, Kazuyoshi Kanehira,  
Ryota Funakoshi, Yui Takashima, Masahiro Awaka, Hitoshi Ishii, Makoto Nakayama,  
Hiroki Honda, Ryo Kaneda, Masahisa Takagi

### **Sapporo City General Hospital**

Hiroshi Yamamoto, Shigeaki Ogura, Kenji Akie, Fumihiro Honmura, Shinichi Kusudou,  
Hiroshi Izumi, Kensuke Baba, Hiroki Goya, Kihoko Kitamura, Shiho Mineta, Takayo  
Takeda, Kiyoshi Kubo, Junko Yamaguchi, Hiroshi Nara

### **Otaru City Hospital**

Tsuyoshi Nakano, Chihiro Naka, Hiroko Sato, Teiji Yamamoto, Toshio Abe, Nobuo  
Tomita

### **Otaru Kyokai Hospital**

Yuji Ootsuka, Naoki Watanabe, Takashi Niikura, Shuji Terada

**Hokkaido Social Insurance Hospital (current: JCHO Hokkaido Hospital)**

Fujiya Kishi, Akihito Ito, Michihiro Fujino, Masahi Ohe, Toshiyuki Harada, Yasuko Noda, Teruyo Takahashi, Keiko Abe, Akira Nakajima, Tomonori Fujii, Hiroshige Mori, Hideo Taguchi, Takashi Kojima, Ryouji Minami, Shigeki Murakami, Yuzuri Oono, Osamu Ishigamori, Satoru Akimoto, Takashi Emoto, Daichi Takahashi, Risa Ajioka

**Iwamizawa City General Hospital**

Akira Kamimura, Nobuyuki Hakuma, Noriaki Sukou, Eriko Anada, Tamaki Numata, Teiko Itakura, Tomoko Iizawa, Rina Ohya, Yoshihiro Honoki

**Sapporo Social Insurance General Hospital (current: JCHO Sapporo Hokushin Hospital)**

Kazuo Takaoka, Isamu Doi, Miki Suzuki, Sachiko Komuro, Yoshiko Yoshida, Michiko Kobayashi, Hitoshi Seki

**Kinikyo Chuo Hospital**

Atsushi Ishimine, Ryoji Nakano, Masako Ishihara, Fumiyo Itagaki, Naoya Matsuzaka, Takae Kosukegawa, Eriko Miyajima, Kimitsugu Nakamura, Wako Funayama, Katsumigi Tsuchiya, Ryouji Kaihatsu

**Tenshi Hospital**

Kaoru Kamishima, Yasushi Hasegawa

**First Department of Medicine, Hokkaido University Hospital/Department of  
Respiratory Medicine, Faculty of Medicine and Graduate School of Medicine,  
Hokkaido University**

Hiroki Kimura, Hirokazu Kimura, Nobuyuki Hizawa, Tomoko Betsuyaku, Kunio  
Hamada, Yoko Ito, Motoko Kobayashi, Takeshi Hosokawa, Masaru Hasegawa, Nao  
Odajima, Chinatsu Moriyama, Takayuki Yoshida, Takashi Inomata, Kanako Maki, Eiji  
Shibuya, Yoshiko Obata, Kotomi Hosono, Kana Yoshikuni, Tomoko Akiyama, Yoko  
Tani, Yuka Sugiura

**Department of Radiology, Hokkaido University Hospital**

Yuya Onodera

**Division of Radiology, Department of Diagnosis and Treatment Support Part,  
Hokkaido University Hospital**

Tsukasa Sasaki

**Division of Pulmonary Function, Department of Laboratory Medicine, Hokkaido  
University Hospital**

Katsuaki Nitta, Masafumi Yamamoto, Shigetaka Mizuno, Harue Miyamoto

**Department of Biostatistics, Faculty of Medicine and Graduate School of  
Medicine, Hokkaido University**

Yoichi M. Ito

## **Figure legend**

**Figure E1. The 10-year follow-up status (A) and reasons for discontinuance of spirometric follow-up (B)**

Figure E1

A

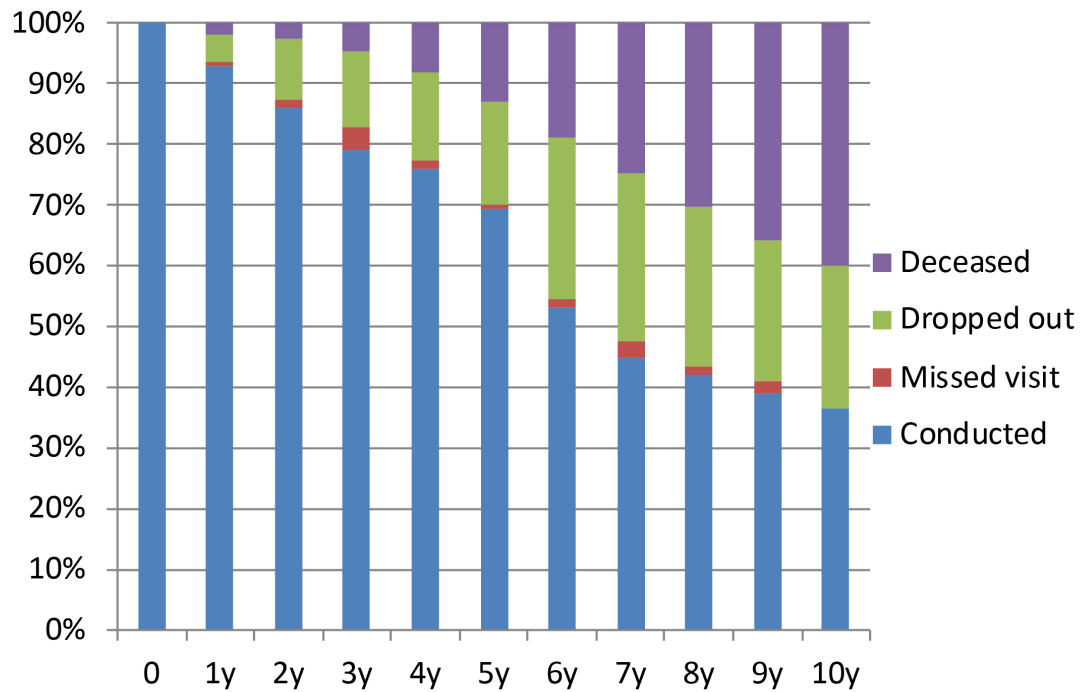

B

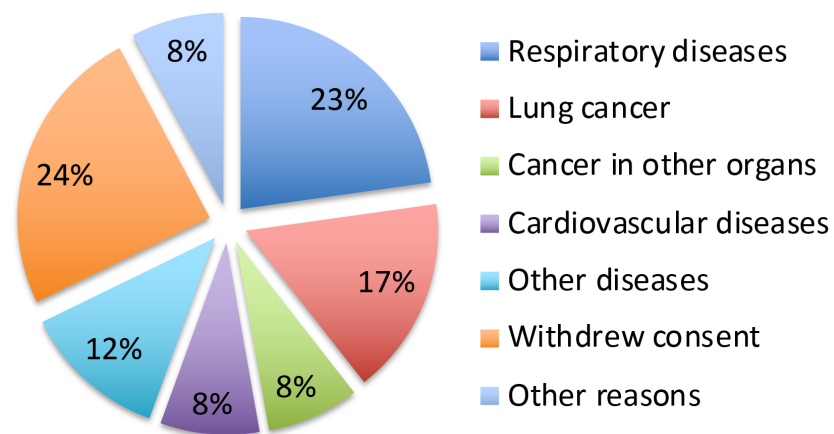

Supplement: Supplementary file 1 [file get_supplementary_file.php]
